# Supplementary material for: Influence of wind stress and the Isonzo/Soča River outflow on surface currents in the Gulf of Trieste
Source: Copernicus journal article supplement (doi:10.5194/egusphere-2025-1176), 2025-03-21
Supplement: Supplementary file [file egusphere-2025-1176-AC2-supplement.pdf]

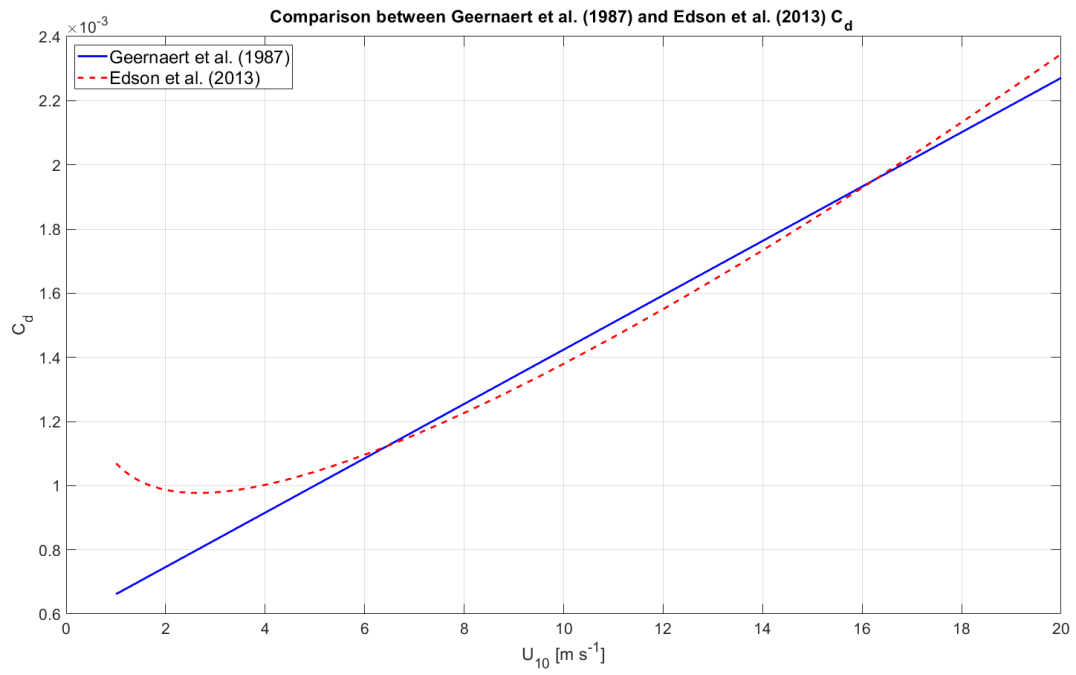

Figure RC2.1: Comparison between Geernaert  $C_d$  and Edson  $C_d$ .

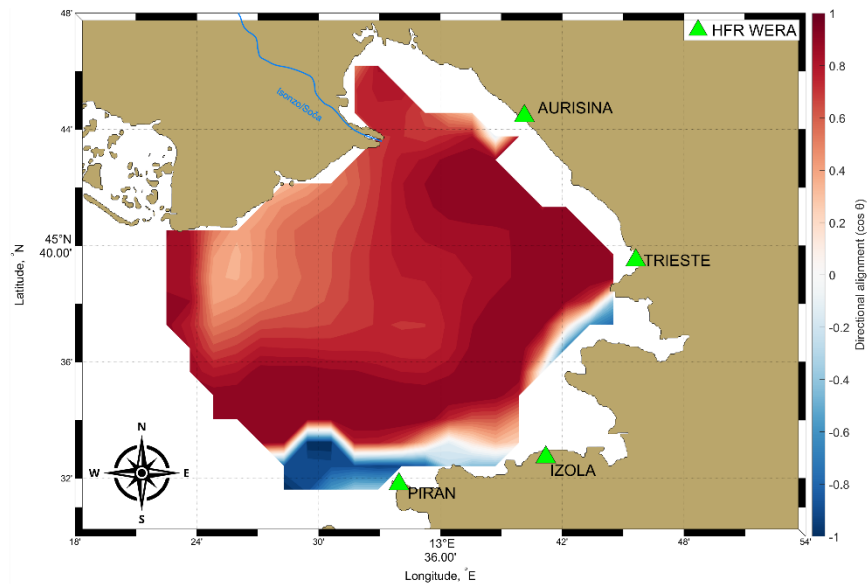

a)

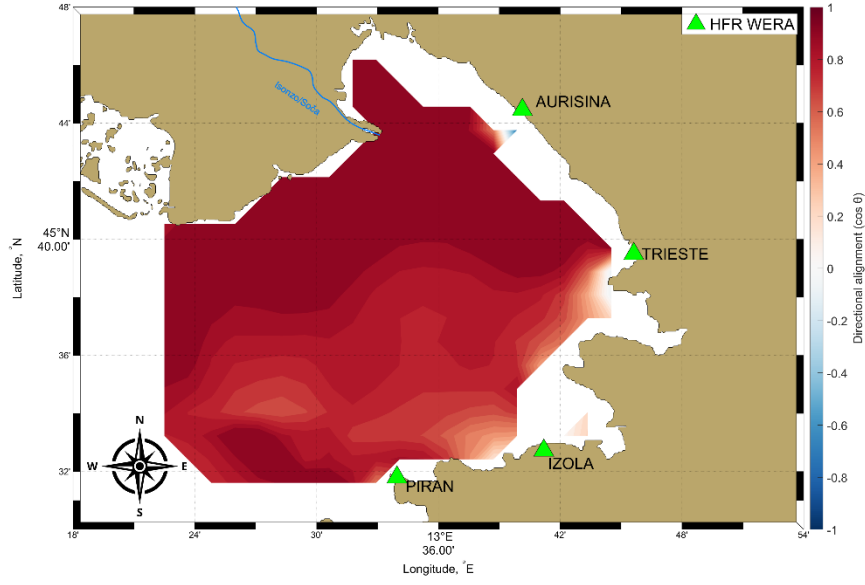

b)

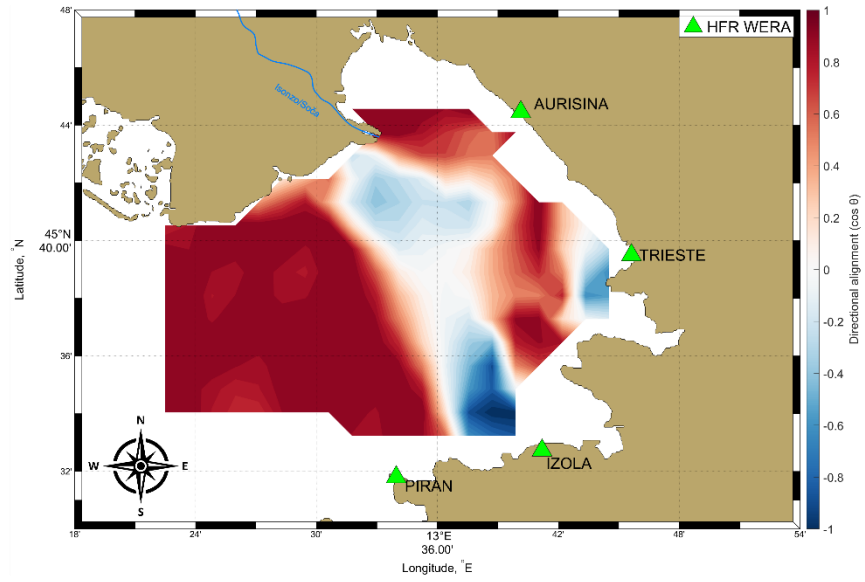

c)

**Figure S1: (a) Directional alignment ( $\cos \theta$ ) map on 15th October 2023 19:00 UTC (Bora event). (b) Directional alignment ( $\cos \theta$ ) map on 27th October 2023 05:00 UTC (Southerly wind event). (c) Directional alignment ( $\cos \theta$ ) map on 28th October 2023 01:00 UTC (Southerly wind and strong river outflow event).**
